# Supplementary material for: BCG Induces Protection against Mycobacterium tuberculosis Infection in the Wistar Rat Model
Source: PubMed Central journal article supplement (PMC3230592; doi:10.1371/journal.pone.0028082), 2011-12-05

Figure S3

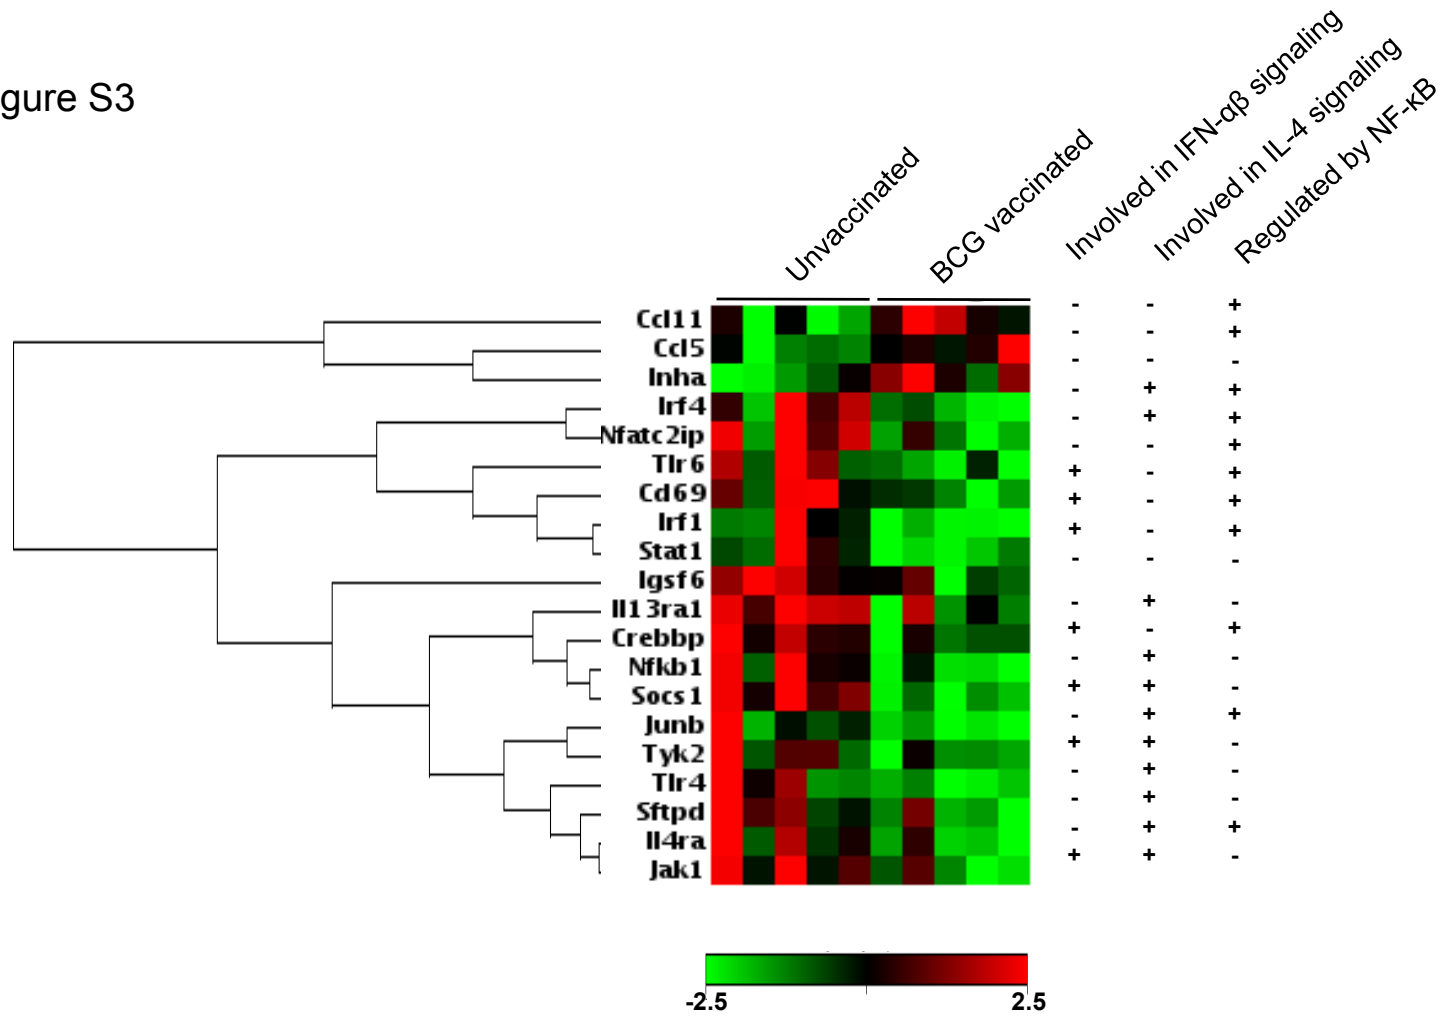

Supplement: pone.0028082.s003.pdf [file pone.0028082.s003.pdf]
