# Supplementary material for: BCG Induces Protection against Mycobacterium tuberculosis Infection in the Wistar Rat Model
Source: PubMed Central journal article supplement (PMC3230592; doi:10.1371/journal.pone.0028082), 2011-12-05
Supplement: pone.0028082.s004.pdf [file pone.0028082.s004.pdf]

**Table S1**

| Genes     | Description                                                                          | Fold regulation (BCG vaccinated / Unvaccinated) | P value (Fold difference) |
|-----------|--------------------------------------------------------------------------------------|-------------------------------------------------|---------------------------|
| Bcl3      | B-cell CLL/lymphoma 3                                                                | -1.0963                                         | 0.696573                  |
| Bcl6      | B-cell CLL/lymphoma 6                                                                | -1.2472                                         | 0.267927                  |
| Ccl11     | Chemokine (C-C motif) ligand 11                                                      | 1.7211                                          | 0.022125                  |
| Ccl5      | Chemokine (C-C motif) ligand 5                                                       | 1.6081                                          | 0.020024                  |
| Ccl7      | Chemokine (C-C motif) ligand 7                                                       | -1.0201                                         | 0.858006                  |
| Ccr2      | Chemokine (C-C motif) receptor 2                                                     | -1.5397                                         | 0.150071                  |
| Ccr3      | Chemokine (C-C motif) receptor 3                                                     | -1.4346                                         | 0.149149                  |
| Ccr4      | Chemokine (C-C motif) receptor 4                                                     | -1.2097                                         | 0.348117                  |
| Ccr5      | Chemokine (C-C motif) receptor 5                                                     | -1.2524                                         | 0.35655                   |
| Cd28      | Cd28 molecule                                                                        | -1.3743                                         | 0.206961                  |
| Cd4       | Cd4 molecule                                                                         | -1.3201                                         | 0.299008                  |
| Cd69      | Cd69 molecule                                                                        | -1.3385                                         | 0.020978                  |
| Cd80      | Cd80 molecule                                                                        | -1.6686                                         | 0.160236                  |
| Cd86      | CD86 molecule                                                                        | -1.3367                                         | 0.149225                  |
| Cebpb     | CCAAT/enhancer binding protein (C/EBP), beta                                         | 1.0405                                          | 0.570579                  |
| Crebbp    | CREB binding protein                                                                 | -1.776                                          | 0.012897                  |
| Csf2      | Colony stimulating factor 2 (granulocyte-macrophage)                                 | 1.123                                           | 0.692184                  |
| Ctla4     | Cytotoxic T-lymphocyte-associated protein 4                                          | -1.4012                                         | 0.136505                  |
| Cxcr3     | Chemokine (C-X-C motif) receptor 3                                                   | -1.1881                                         | 0.378557                  |
| Gata3     | GATA binding protein 3                                                               | -1.6943                                         | 0.109137                  |
| Gfi1      | Growth factor independent 1 transcription repressor                                  | 1.0107                                          | 0.957049                  |
| Ccr10     | Chemokine (C-C motif) receptor 10                                                    | -1.0963                                         | 0.696573                  |
| Icos      | Inducible T-cell co-stimulator                                                       | -1.0738                                         | 0.602329                  |
| Ifng      | Interferon gamma                                                                     | 2.0141                                          | 0.059143                  |
| Igsf6     | Immunoglobulin superfamily, member 6                                                 | -1.4149                                         | 0.034131                  |
| Il10      | Interleukin 10                                                                       | -1.3954                                         | 0.406909                  |
| Il12b     | Interleukin 12b                                                                      | -1.2576                                         | 0.337794                  |
| Il12rb2   | Interleukin 12 receptor, beta 2                                                      | 1.2053                                          | 0.482043                  |
| Il13      | Interleukin 13                                                                       | -1.0963                                         | 0.696573                  |
| Il13ra1   | Interleukin 13 receptor, alpha 1                                                     | -1.3092                                         | 0.01342                   |
| Il15      | Interleukin 15                                                                       | -1.1116                                         | 0.356151                  |
| Il18      | Interleukin 18                                                                       | -1.2769                                         | 0.064647                  |
| Il18bp    | Interleukin 18 binding protein                                                       | -1.1508                                         | 0.383094                  |
| Il18r1    | Interleukin 18 receptor 1                                                            | -1.0473                                         | 0.596999                  |
| Il1r1     | Interleukin 1 receptor, type I                                                       | -1.124                                          | 0.44618                   |
| Il2       | Interleukin 2                                                                        | -1.0963                                         | 0.696573                  |
| Il27ra    | Interleukin 27 receptor, alpha                                                       | -1.4729                                         | 0.235637                  |
| Il2ra     | Interleukin 2 receptor, alpha                                                        | -1.409                                          | 0.084662                  |
| Il4       | Interleukin 4                                                                        | -1.0963                                         | 0.696573                  |
| Il4ra     | Interleukin 4 receptor, alpha                                                        | -1.6919                                         | 0.032173                  |
| Il5       | Interleukin 5                                                                        | -1.0634                                         | 0.76369                   |
| Il6       | Interleukin 6                                                                        | 1.0234                                          | 0.837767                  |
| Il7       | Interleukin 7                                                                        | 1.1091                                          | 0.43704                   |
| Il9       | Interleukin 9                                                                        | -1.0963                                         | 0.696573                  |
| Inha      | Inhibin alpha                                                                        | 1.6464                                          | 0.016829                  |
| Irf1      | Interferon regulatory factor 1                                                       | -1.9354                                         | 0.013039                  |
| Irf4      | Interferon regulatory factor 4                                                       | -2.1004                                         | 0.020598                  |
| Jak1      | Janus kinase 1                                                                       | -1.3724                                         | 0.026247                  |
| Jak2      | Janus kinase 2                                                                       | -1.1429                                         | 0.109609                  |
| Jak3      | Janus kinase 3                                                                       | -2.2263                                         | 0.188608                  |
| Junb      | Jun B proto-oncogene                                                                 | -2.026                                          | 0.022494                  |
| LOC307231 | Similar to nuclear factor of activated T-cells, cytoplasmic, calcineurin-dependent 1 | -1.5962                                         | 0.063602                  |
| Maf       | V-maf musculoaponeurotic fibrosarcoma oncogene homolog 1                             | -1.3877                                         | 0.077008                  |
| Mapk8     | Mitogen-activated protein kinase 8                                                   | -1.1701                                         | 0.501496                  |

|          |                                                                                               |         |          |
|----------|-----------------------------------------------------------------------------------------------|---------|----------|
| Mapk9    | Mitogen-activated protein kinase 9                                                            | -1.0257 | 0.804591 |
| Cd27     | CD27 molecule                                                                                 | -1.311  | 0.255724 |
| Nfatc2   | Nuclear factor of activated T-cells, cytoplasmic, calcineurin-dependent 2                     | -1.3857 | 0.179315 |
| Nfatc2ip | Nuclear factor of activated T-cells, cytoplasmic, calcineurin-dependent 2 interacting protein | -1.5227 | 0.024226 |
| Nfatc3   | Nuclear factor of activated T-cells, cytoplasmic, calcineurin-dependent 3                     | -1.3238 | 0.056555 |
| Nfkb1    | Nuclear factor of kappa light polypeptide gene enhancer in B-cells 1                          | -2.083  | 0.008828 |
| Ptpnc    | Protein tyrosine phosphatase, receptor type, C                                                | -1.0738 | 0.15389  |
| Il27     | Interleukin 27                                                                                | -1.3019 | 0.234823 |
| Socs5    | Suppressor of cytokine signaling 5                                                            | -1.0286 | 0.660653 |
| Pcgf2    | Polycomb group ring finger 2                                                                  | -1.2805 | 0.294523 |
| Sftpd    | Surfactant protein D                                                                          | -1.594  | 0.048367 |
| Socs1    | Suppressor of cytokine signaling 1                                                            | -2.5362 | 0.000336 |
| Socs3    | Suppressor of cytokine signaling 3                                                            | -1.7227 | 0.065168 |
| Spp1     | Secreted phosphoprotein 1                                                                     | -2.1004 | 0.052306 |
| Stat1    | Signal transducer and activator of transcription 1                                            | -1.8285 | 0.011303 |
| Stat4    | Signal transducer and activator of transcription 4                                            | 1.058   | 0.975823 |
| Tbx21    | T-box 21                                                                                      | -1.9408 | 0.067615 |
| Dazap2   | DAZ associated protein 2                                                                      | 1.0121  | 0.935981 |
| Tgfb3    | Transforming growth factor, beta 3                                                            | -1.0918 | 0.605199 |
| Tlr4     | Toll-like receptor 4                                                                          | -1.4346 | 0.025019 |
| Tlr6     | Toll-like receptor 6                                                                          | -1.5896 | 0.021118 |
| Tmed1    | Transmembrane emp24 protein transport domain containing 1                                     | 1.0334  | 0.813272 |
| Tnf      | Tumor necrosis factor (TNF superfamily, member 2)                                             | 1.1075  | 0.700099 |
| Tnfrsf4  | Tumor necrosis factor receptor superfamily, member 4                                          | -1.0812 | 0.696901 |
| Cd40     | CD40 molecule, TNF receptor superfamily member 5                                              | -1.2131 | 0.183233 |
| Tnfrsf8  | Tumor necrosis factor receptor superfamily, member 8                                          | -1.2559 | 0.23997  |
| Tnfsf4   | Tumor necrosis factor (ligand) superfamily, member 4                                          | -1.0963 | 0.696573 |
| Cd40lg   | CD40 ligand                                                                                   | -1.293  | 0.389769 |
| Tyk2     | Tyrosine kinase 2                                                                             | -1.5376 | 0.046887 |
| Yy1      | YY1 transcription factor                                                                      | -1.0767 | 0.446156 |
